# Supplementary material for: Electrochemiluminescent TiO2/CdS nanocomposites for efficient immunosensing of HepG2 cells
Source: Royal Society of Chemistry journal article supplement (doi:10.1039/c3tb20868k), 2013-01-01
Supplement: c3tb20868k.pdf [file c3tb20868k.pdf]

## Electrochemiluminescent TiO<sub>2</sub>/CdS nanocomposites for efficient immunosensing of Hep G2 cell

Lei Wang<sup>a</sup>, Shenghua Ma<sup>a</sup>, Xuejing Wang<sup>a</sup>, Danqing Liu<sup>a,b</sup>, Shaoqin Liu<sup>b</sup>, Xiaojun Han<sup>a\*</sup>

<sup>a</sup>State Key Laboratory of Urban Water Resource and Environment, School of Chemical Engineering and Technology, Harbin Institute of Technology, Harbin 150001, China

<sup>b</sup>Center of Nano and Microtechnologies, Harbin Institute of Technology, Harbin 150080, China

Email: hanxiaojun@hit.edu.cn

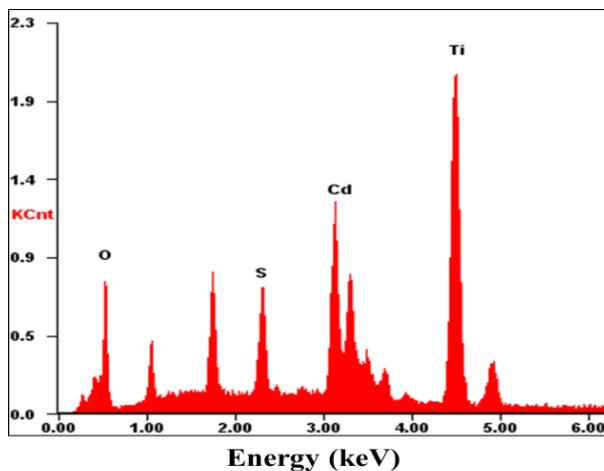

**Fig SI 1.** EDS spectrum of CdS-capped TiO<sub>2</sub> hybrid nanoparticles.  
EDS analysis was performed by using an EX-250 (Horiba, Japan) attachment.

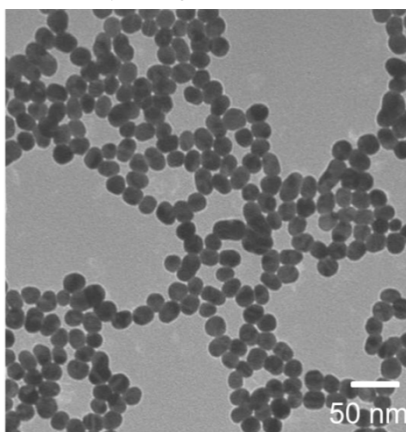

**Fig SI 2.** TEM of gold nanoparticles.  
TEM images were recorded on a JEOL JSM-6700F instrument (Hitachi).

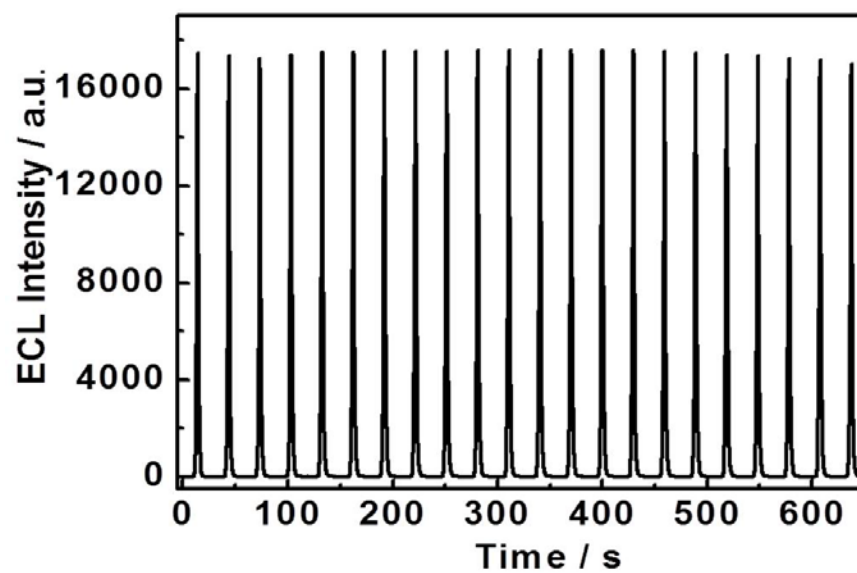

**Fig SI 3.** ECL- time curve in PBS (0.1 M, pH 7.4 containing 0.1 M KCl and 0.05 M  $\text{K}_2\text{S}_2\text{O}_8$ ). The scan rate was 100 mV/s and the PMT voltage was -800 V.
